# Supplementary material for: Effects of personality on the developmental trajectories of academic burnout among Korean medical students
Source: PeerJ. 2020 Nov 12;8:e10362. doi: 10.7717/peerj.10362 (PMC7666816; doi:10.7717/peerj.10362)
Supplement: Supplemental Information 1 [file peerj-08-10362-s001.xlsx]

## Sheet: raw data_06302020
sex	age	education	grade	NS	HA	RD	PS	SD	CO	ST	emotionalexhuastion@1	cynism@1	inefficiency@1	totalburnout@1	emotionalexhuastion@2	cynism@2	inefficiency@2	totalburnout@2	emotionalexhuastion@3	cynism@3	inefficiency@3	totalburnout@3
2	35	3	2	22	30	45	46	57	62	44	22	8	20	50	25	8	24	57	26	8	16	50
2	26	2	4	31	42	32	57	61	53	35	27	11	18	56	8	10	16	34	20	12	16	48
2	26	2	2	41	20	24	46	58	53	14	13	13	30	56	5	12	31	48	8	10	36	54
1	31	3	2	31	32	36	54	54	56	13	13	7	18	38	12	11	25	48	14	11	20	45
2	31	3	1	50	43	47	40	43	52	47	19	14	25	58	18	16	24	58	14	18	27	59
2	31	3	3	20	36	54	45	65	69	33	25	15	25	65	22	15	24	61	33	16	12	61
1	36	2	3	20	61	25	19	26	37	40	26	19	26	71	30	16	28	74	29	20	29	78
2	30	2	3	27	21	47	52	62	66	25	27	6	24	57	22	8	21	51	29	15	22	66
2	26	2	3	41	33	59	54	51	60	27	17	13	23	53	20	15	22	57	21	14	25	60
1	27	2	1	44	35	54	39	38	46	7	27	12	21	60	27	16	21	64	15	9	17	41
2	27	2	2	30	33	44	39	53	58	21	10	8	24	42	8	8	15	31	9	5	12	26
2	33	3	3	22	41	42	44	50	58	29	30	12	21	63	35	18	24	77	30	13	19	62
2	24	2	2	52	28	67	49	70	78	39	16	8	25	49	9	4	12	25	12	14	29	55
1	28	2	3	38	34	45	54	51	44	7	10	5	18	33	26	8	24	58	30	14	23	67
1	30	2	3	38	37	50	40	41	48	19	24	11	25	60	23	12	26	61	21	13	27	61
2	27	2	2	48	41	47	36	48	56	48	12	7	19	38	28	13	24	65	31	19	27	77
2	30	3	3	34	33	62	44	53	70	26	26	24	19	69	28	23	17	68	26	23	20	69
2	26	3	3	52	41	60	55	55	55	40	22	15	22	59	27	17	23	67	21	20	24	65
2	36	2	3	27	61	27	34	39	50	32	26	22	24	72	32	28	27	87	27	24	29	80
1	25	2	2	29	26	54	51	58	72	30	21	8	12	41	13	4	21	38	15	8	23	46
1	31	3	3	37	27	42	59	62	47	8	18	4	6	28	14	4	11	29	19	16	15	50
2	26	2	3	31	35	46	45	55	69	41	30	16	25	71	29	23	22	74	35	18	23	76
2	25	2	1	27	61	38	54	44	49	34	20	12	21	53	20	18	23	61	20	18	25	63
1	32	3	2	19	34	32	54	60	56	26	19	16	28	63	22	18	24	64	29	22	29	80
2	29	2	4	31	35	57	52	63	44	35	28	17	24	69	25	16	21	62	22	19	22	63
1	37	3	2	17	28	48	62	62	65	15	26	8	10	44	33	13	16	62	28	8	14	50
2	27	3	4	38	55	43	43	40	57	50	18	5	11	34	30	5	12	47	14	7	12	33
1	32	2	3	32	22	51	45	54	63	15	13	7	21	41	13	10	23	46	19	8	28	55
1	27	2	3	41	29	43	47	57	55	25	21	16	24	61	22	14	23	59	24	16	24	64
1	31	2	4	27	36	42	55	58	73	40	21	8	23	52	20	8	23	51	10	10	21	41
1	31	2	3	20	19	46	54	67	62	38	10	6	16	32	9	7	13	29	17	12	22	51
2	25	2	1	37	34	43	56	62	68	40	13	6	21	40	28	9	19	56	23	8	20	51
2	24	2	1	52	24	62	74	73	76	64	32	16	6	54	35	28	29	92	35	28	26	89
2	26	2	3	54	40	49	49	43	56	35	17	15	24	56	22	17	22	61	22	17	22	61
1	34	2	2	34	56	38	49	41	58	24	17	14	20	51	15	12	21	48	21	16	22	59
1	26	2	2	29	36	53	59	52	61	25	11	11	21	43	24	11	26	61	19	9	26	54
2	37	2	4	32	32	45	35	44	58	29	25	8	17	50	20	6	12	38	11	9	18	38
2	30	3	2	22	43	57	43	53	52	15	21	8	24	53	19	10	18	47	24	8	15	47
1	3	2	2	44	28	33	29	32	56	22	17	12	23	52	20	11	22	53	22	16	23	61
2	29	2	4	26	41	46	42	54	54	11	11	6	20	37	12	11	25	48	20	16	24	60
2	26	2	1	27	54	47	39	42	57	21	35	12	25	72	25	17	26	68	30	14	27	71
1	31	2	4	33	42	46	49	42	58	47	16	11	34	61	16	9	24	49	18	14	19	51
1	39	2	2	32	38	52	59	62	71	12	15	11	16	42	17	18	19	54	13	12	22	47
1	26	2	2	41	45	42	41	54	60	30	13	8	19	40	16	8	15	39	20	14	22	56
2	26	2	1	45	32	36	37	44	56	37	22	6	23	51	28	12	33	73	31	6	25	62
2	30	3	3	20	39	39	56	57	59	40	20	14	17	51	15	11	21	47	24	6	17	47
2	25	2	2	29	28	48	52	60	57	20	14	7	23	44	8	7	23	38	20	14	24	58
2	28	2	4	32	36	47	51	58	62	25	5	4	19	28	10	4	22	36	9	8	21	38
2	26	2	1	57	55	53	54	30	59	23	26	22	11	59	29	17	17	63	22	8	17	47
1	31	2	1	20	41	33	41	55	46	21	18	7	20	45	27	14	19	60	24	16	20	60
2	25	2	2	30	45	55	30	39	68	27	14	11	27	52	16	7	24	47	19	11	26	56
1	35	2	2	34	24	54	53	66	73	43	21	23	31	75	16	28	34	78	19	28	31	78
2	25	2	2	31	69	50	49	37	49	28	21	18	23	62	30	24	22	76	34	20	19	73
1	27	2	2	25	42	39	50	48	64	42	8	5	15	28	14	5	17	36	10	5	17	32
1	28	2	4	42	55	36	26	30	53	9	35	21	22	78	34	21	25	80	35	28	42	105
1	43	2	2	42	31	48	61	57	53	65	29	16	13	58	31	22	17	70	25	22	17	64
1	29	2	1	36	34	48	42	51	56	16	10	8	24	42	26	17	24	67	12	18	32	62
1	31	2	1	52	15	63	57	58	67	42	13	6	22	41	13	9	23	45	13	9	20	42
1	29	3	1	21	45	34	26	32	54	13	16	6	25	47	24	10	26	60	18	9	26	53
2	23	2	1	25	54	39	48	53	52	29	17	8	14	39	25	8	21	54	24	16	23	63
1	27	2	1	57	33	66	63	54	62	56	15	8	13	36	23	11	18	52	25	12	18	55
2	25	3	3	32	26	67	72	62	68	35	18	4	21	43	15	12	18	45	19	13	22	54
2	36	3	1	41	22	39	39	69	67	63	10	8	20	38	16	8	22	46	23	16	25	64
1	27	2	2	27	45	39	47	42	60	27	28	11	27	66	17	9	23	49	31	16	15	62
1	31	3	1	31	45	30	48	59	52	22	10	6	14	30	12	20	20	52	20	16	21	57
2	28	3	3	49	46	40	34	42	34	34	15	11	26	52	20	15	24	59	22	11	21	54
2	35	3	3	33	25	68	59	60	75	51	35	21	21	77	34	26	19	79	35	23	23	81
2	27	2	4	31	49	36	43	40	49	30	17	10	27	54	21	13	26	60	15	15	27	57
2	30	2	1	46	25	50	56	61	69	46	12	7	12	31	12	7	14	33	16	6	12	34
1	28	3	1	28	39	49	46	61	63	33	10	8	17	35	11	7	28	46	18	11	27	56
1	29	3	4	46	22	58	37	52	68	29	16	12	10	38	9	8	6	23	13	21	7	41
2	24	2	2	54	27	55	55	59	79	30	19	8	19	46	16	11	21	48	14	16	14	44
2	31	2	1	14	63	36	37	41	71	49	20	7	26	53	27	13	29	69	27	15	26	68
1	29	3	2	43	39	50	47	42	56	32	22	12	24	58	23	19	19	61	30	24	25	79
2	26	2	4	37	42	57	40	51	56	21	24	16	21	61	22	12	18	52	22	20	16	58
1	39	3	2	47	54	46	52	37	48	37	25	11	15	51	29	20	18	67	35	22	23	80
1	29	2	3	28	37	45	49	49	59	39	24	6	21	51	18	8	19	45	35	10	16	61
2	35	3	4	19	47	40	38	49	44	23	10	8	23	41	11	8	19	38	10	10	15	35
1	31	2	3	11	42	36	33	50	56	10	14	6	30	50	10	12	22	44	12	8	20	40
2	23	2	2	28	46	66	56	62	76	27	5	4	19	28	20	4	18	42	19	6	18	43
1	26	2	2	28	48	57	37	51	65	37	15	5	15	35	24	7	25	56	24	7	25	56
1	36	2	1	26	52	42	47	47	57	30	22	5	17	44	26	13	24	63	27	19	22	68
1	27	2	1	30	54	43	35	40	50	16	19	10	25	54	11	14	28	53	12	12	28	52
2	26	2	2	35	53	42	47	45	53	43	16	8	24	48	20	10	25	55	22	10	18	50
1	28	3	3	40	36	54	61	53	67	28	30	24	8	62	23	16	19	58	33	23	24	80
1	21	2	1	33	43	38	37	38	52	26	25	12	28	65	12	11	31	54	11	17	29	57
2	23	2	1	35	36	63	56	47	61	36	14	5	18	37	24	6	22	52	31	19	23	73
1	33	3	2	20	30	44	42	59	61	38	23	12	20	55	20	13	19	52	23	10	21	54
2	28	2	4	55	43	55	62	38	39	38	7	10	17	34	13	6	20	39	10	5	16	31
2	31	3	2	40	22	35	42	69	60	26	9	4	15	28	9	4	15	28	6	4	13	23
1	33	2	3	39	40	41	48	41	50	15	14	14	22	50	15	11	27	53	16	8	26	50
1	32	3	1	20	34	38	42	52	50	15	29	8	23	60	23	15	32	70	27	13	31	71
1	26	2	1	29	36	51	60	59	68	29	16	8	14	38	18	9	16	43	11	7	12	30
1	31	2	1	26	25	41	53	56	53	15	19	12	17	48	21	15	16	52	14	14	16	44
1	27	2	1	33	35	51	46	53	62	11	15	8	22	45	10	8	21	39	12	5	19	36
2	31	2	4	11	48	45	40	58	62	18	11	7	24	42	9	7	24	40	10	7	18	35
1	30	2	2	45	30	50	50	47	70	32	9	8	19	36	10	10	27	47	8	14	18	40
1	27	2	2	46	51	28	30	26	43	33	24	19	31	74	24	20	33	77	30	21	33	84
1	41	3	2	42	53	44	51	38	54	38	25	17	18	60	21	14	23	58	26	16	25	67
2	26	2	3	18	56	43	40	33	56	22	30	16	24	70	33	22	24	79	35	25	25	85
1	40	3	4	49	23	49	34	64	63	44	9	20	19	48	9	19	20	48	12	21	18	51
2	31	3	3	13	50	41	38	53	49	15	21	16	24	61	20	16	24	60	24	19	29	72
1	32	3	1	36	26	43	41	66	53	26	6	4	16	26	18	5	13	36	16	9	16	41
2	29	2	1	27	42	42	57	48	62	32	18	14	27	59	25	16	26	67	20	14	26	60
1	32	2	2	42	50	29	37	38	51	29	23	18	33	74	26	23	31	80	17	17	24	58
1	29	3	4	33	28	60	35	57	68	44	13	4	20	37	10	6	28	44	10	4	12	26
2	32	2	3	39	44	40	40	38	57	23	9	14	18	41	24	14	24	62	35	28	24	87
1	33	2	4	51	37	57	50	71	72	38	27	4	14	45	21	4	10	35	20	4	12	36
1	25	2	1	41	56	54	43	25	61	37	18	14	26	58	13	8	24	45	29	15	23	67
1	30	2	3	25	53	26	35	36	47	27	14	19	25	58	26	20	27	73	35	28	26	89
2	22	2	1	50	34	42	46	57	54	26	19	11	17	47	24	16	21	61	30	24	23	77
2	27	2	4	25	50	45	39	50	62	24	23	13	24	60	14	12	22	48	13	10	19	42
1	25	2	1	37	40	29	48	48	45	13	10	16	13	39	11	14	24	49	20	16	19	55
2	35	3	3	26	34	38	36	50	64	25	26	21	24	71	33	25	29	87	30	24	26	80
1	34	3	2	33	44	43	45	50	65	17	17	16	18	51	19	13	29	61	19	17	20	56
2	27	2	2	25	10	63	48	62	56	13	20	16	24	60	20	16	24	60	26	22	21	69
1	38	2	2	30	52	48	62	45	56	35	22	22	22	66	24	21	17	62	28	6	9	43
1	27	2	1	32	43	50	42	44	63	29	18	7	18	43	19	6	23	48	17	11	23	51
2	30	2	2	56	60	47	48	32	61	34	23	7	22	52	22	11	31	64	32	12	33	77
2	30	2	4	35	40	35	56	61	58	29	23	12	26	61	14	7	22	43	10	9	20	39
2	31	3	3	25	25	59	64	55	75	27	25	14	27	66	23	12	21	56	32	13	22	67
2	23	2	2	38	48	30	49	56	61	37	28	4	15	47	35	4	18	57	35	26	14	75
2	25	2	3	29	52	59	38	44	52	37	26	14	24	64	30	8	21	59	17	8	15	40
2	24	2	1	49	23	61	56	52	46	15	27	14	17	58	24	17	24	65	22	15	22	59
2	34	3	1	30	21	47	40	55	44	55	20	12	19	51	20	18	24	62	24	23	24	71
2	25	2	1	47	9	59	56	66	63	26	10	6	16	32	15	5	18	38	11	7	13	31
1	28	2	3	26	19	39	51	59	62	18	27	9	13	49	12	13	8	33	24	10	7	41
1	38	3	4	31	44	43	43	50	52	25	24	16	23	63	20	13	24	57	19	15	23	57
2	34	3	3	20	61	47	46	46	45	14	27	18	26	71	32	16	29	77	35	16	22	73
1	28	3	3	42	28	53	52	63	57	22	20	6	14	40	24	9	20	53	26	21	28	75
2	27	3	3	40	28	37	37	53	56	30	20	17	26	63	29	20	28	77	29	26	27	82
2	29	3	3	28	31	51	52	60	68	31	12	12	16	40	24	13	20	57	27	17	24	68
1	28	2	2	41	27	51	55	43	60	42	11	8	15	34	14	12	17	43	32	19	18	69
2	33	3	3	33	30	50	44	54	59	40	18	9	21	48	19	11	23	53	24	11	18	53
1	28	2	1	26	40	56	52	59	73	31	16	6	23	45	18	7	19	44	18	8	22	48
2	28	3	3	31	50	48	55	29	56	28	25	12	21	58	32	11	31	74	33	12	30	75
1	31	2	4	27	27	48	51	58	63	32	13	11	18	42	18	12	25	55	10	8	12	30
1	32	2	3	30	47	45	45	50	56	38	20	12	23	55	27	17	22	66	30	19	25	74
2	28	3	1	34	42	38	45	54	53	52	19	4	13	36	19	6	8	33	30	24	24	78
2	30	2	3	23	40	53	31	53	62	12	14	19	20	53	26	20	24	70	24	19	23	66
2	27	3	3	39	39	61	53	52	56	47	13	8	14	35	21	19	14	54	23	12	14	49
1	28	2	1	45	32	37	55	56	52	27	19	13	23	55	26	11	14	51	28	20	19	67
1	30	2	4	41	35	52	37	59	57	40	20	4	16	40	28	13	19	60	26	12	18	56
1	29	2	4	39	23	40	63	67	59	29	25	7	16	48	13	7	13	33	21	7	13	41
2	23	2	1	31	47	49	47	48	54	39	18	8	20	46	26	11	24	61	29	18	24	71
1	37	3	3	20	35	49	39	49	55	14	25	10	16	51	31	11	17	59	32	12	14	58
1	28	2	1	29	33	47	49	64	47	21	15	8	14	37	27	18	22	67	24	22	22	68
2	25	2	1	26	45	49	39	50	61	34	13	8	21	42	23	14	24	61	23	16	25	64
2	26	2	1	42	40	52	58	51	53	63	19	4	13	36	19	8	21	48	19	4	17	40
2	31	2	3	32	38	57	42	56	61	22	20	16	19	55	21	12	20	53	27	16	19	62
1	25	2	2	30	48	44	57	46	40	47	11	13	20	44	24	9	24	57	21	18	27	66
2	26	2	4	21	38	47	47	48	61	45	17	17	24	58	19	16	23	58	16	15	19	50
1	39	3	1	44	38	44	55	40	46	36	10	4	24	38	25	17	16	58	19	13	20	52
1	25	2	1	15	40	43	42	55	47	21	9	4	15	28	10	6	24	40	8	8	23	39
2	26	3	3	37	28	38	48	55	74	42	8	12	24	44	17	5	21	43	12	5	22	39
1	28	2	1	38	26	57	55	67	79	11	19	11	13	43	12	13	21	46	10	21	23	54
1	36	3	3	18	45	39	51	62	67	34	9	4	16	29	13	13	12	38	7	4	10	21
1	26	2	4	31	40	51	54	59	50	24	23	13	23	59	22	14	24	60	17	13	22	52
1	29	2	1	55	63	33	50	30	67	53	31	8	26	65	35	12	30	77	35	24	32	91
2	31	2	3	46	28	59	52	57	75	47	13	8	22	43	20	8	17	45	22	8	15	45
2	28	2	4	29	47	47	72	44	70	25	18	9	26	53	27	20	22	69	18	13	27	58
1	32	2	1	36	28	60	41	59	67	34	22	5	9	36	30	10	15	55	25	10	15	50
2	26	2	4	30	62	40	30	20	50	29	25	26	20	71	23	18	23	64	20	16	24	60
2	25	3	3	27	39	52	28	44	73	34	30	17	25	72	27	15	28	70	32	14	34	80
2	27	2	1	34	64	45	49	41	32	15	24	8	20	52	32	20	20	72	33	25	15	73
1	25	2	3	32	26	51	67	51	54	39	28	26	29	83	29	28	39	96	34	28	39	101
2	32	2	1	28	24	36	55	63	55	29	10	4	14	28	11	11	20	42	5	4	16	25
2	27	2	1	30	34	51	55	56	57	42	9	4	6	19	33	14	14	61	29	24	29	82
1	40	2	2	31	34	43	51	58	65	42	11	9	21	41	6	4	34	44	13	8	26	47
1	36	3	4	18	24	40	45	67	49	8	12	12	24	48	14	14	19	47	23	16	20	59
1	32	3	4	47	25	50	51	56	60	29	18	19	25	62	10	15	23	48	10	20	29	59
1	29	2	4	29	32	43	41	49	53	29	10	9	20	39	13	12	15	40	14	10	13	37
male(1), female(2)		bachelor(2), master(3)
